# Supplementary material for: Enhanced photocatalytic activity, transport properties and electronic structure of Mn doped GdFeO3 synthesized using the sol–gel process
Source: Royal Society of Chemistry journal article supplement (doi:10.1039/d1cp00621e), 2021-01-01
Supplement: d1cp00621e1.pdf [file d1cp00621e1.pdf]

## Supporting Figure

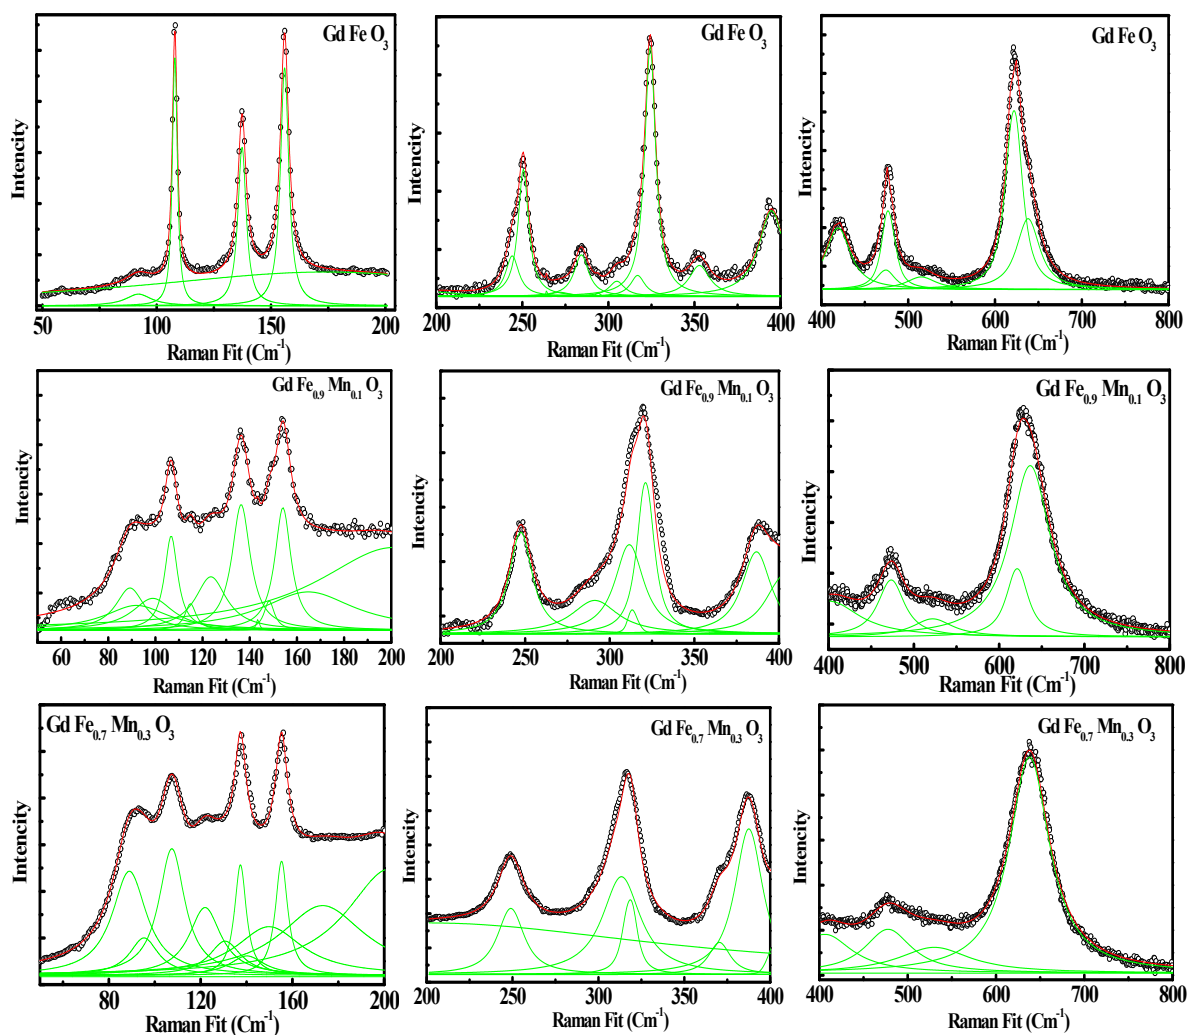

S 1. Raman spectra of  $\text{GdFeO}_3$ ,  $\text{GdFe}_{0.9}\text{Mn}_{0.1}\text{O}_3$  &  $\text{GdFe}_{0.7}\text{Mn}_{0.3}\text{O}_3$  composites.

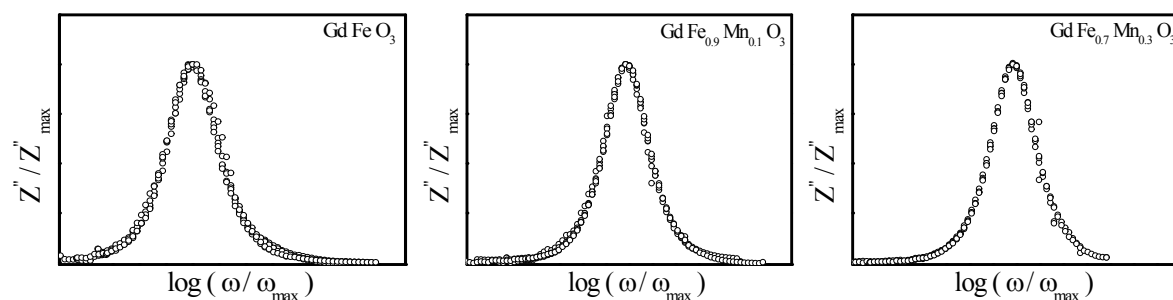

S 2. Scaling behaviour of  $Z''$  for  $\text{GdFeO}_3$ ,  $\text{GdFe}_{0.9}\text{Mn}_{0.1}\text{O}_3$  &  $\text{GdFe}_{0.7}\text{Mn}_{0.3}\text{O}_3$ .

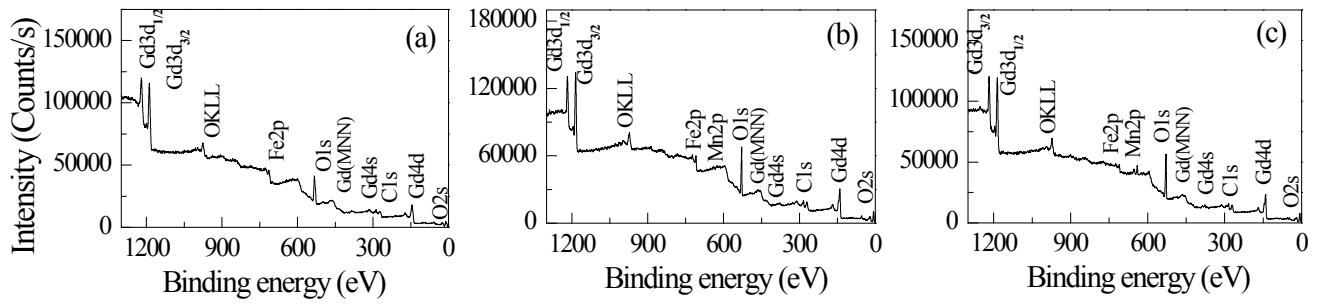

S 3. X-ray photoemission spectra of (a)  $\text{GdFeO}_3$  (b)  $\text{GdFe}_{0.9}\text{Mn}_{0.1}\text{O}_3$  & (c)  $\text{GdFe}_{0.7}\text{Mn}_{0.3}\text{O}_3$ .

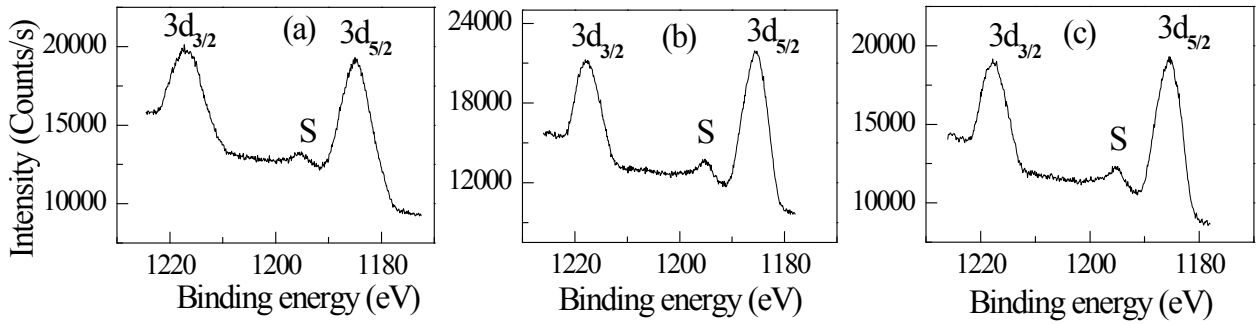

S 4. Core level XPS of Gd-3d (a)  $\text{GdFeO}_3$  (b)  $\text{GdFe}_{0.9}\text{Mn}_{0.1}\text{O}_3$  & (c)  $\text{GdFe}_{0.7}\text{Mn}_{0.3}\text{O}_3$ .

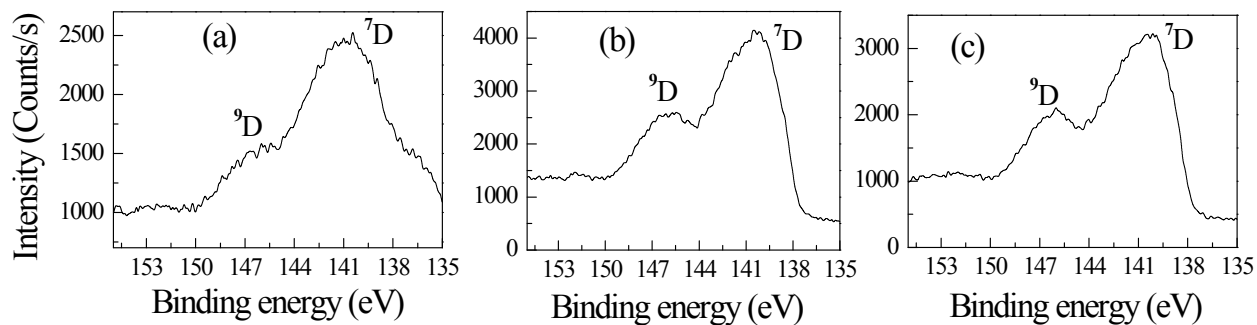

S 5. Core level XPS of Gd-4d (a)  $\text{GdFeO}_3$  (b)  $\text{GdFe}_{0.9}\text{Mn}_{0.1}\text{O}_3$  & (c)  $\text{GdFe}_{0.7}\text{Mn}_{0.3}\text{O}_3$ .

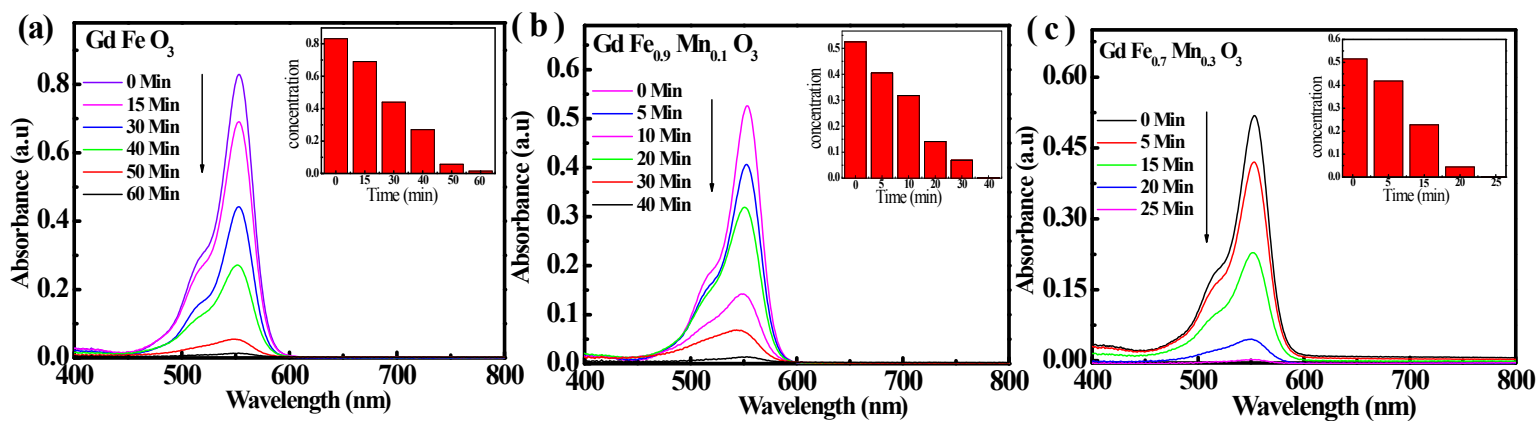

S 6. Absorption spectra of Rh-B solution in visible-light-induced photocatalytic process for (a)  $\text{GdFeO}_3$  (b)  $\text{GdFe}_{0.9}\text{Mn}_{0.1}\text{O}_3$  & (c)  $\text{GdFe}_{0.7}\text{Mn}_{0.3}\text{O}_3$ .

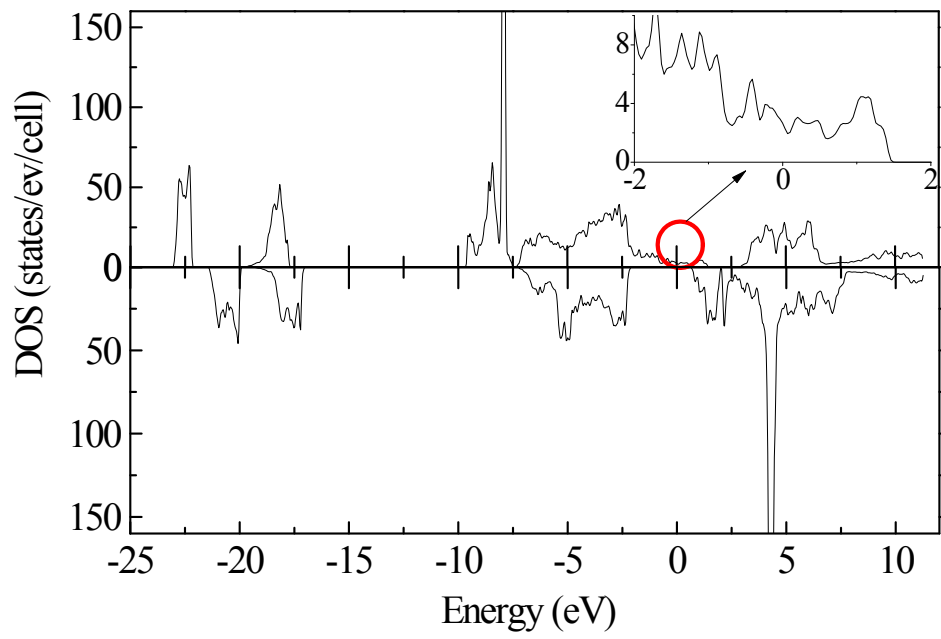

S 7. Spin-polarized DOS spectra of GdFe<sub>0.7</sub>Mn<sub>0.3</sub>O<sub>3</sub> obtained by GGA scheme

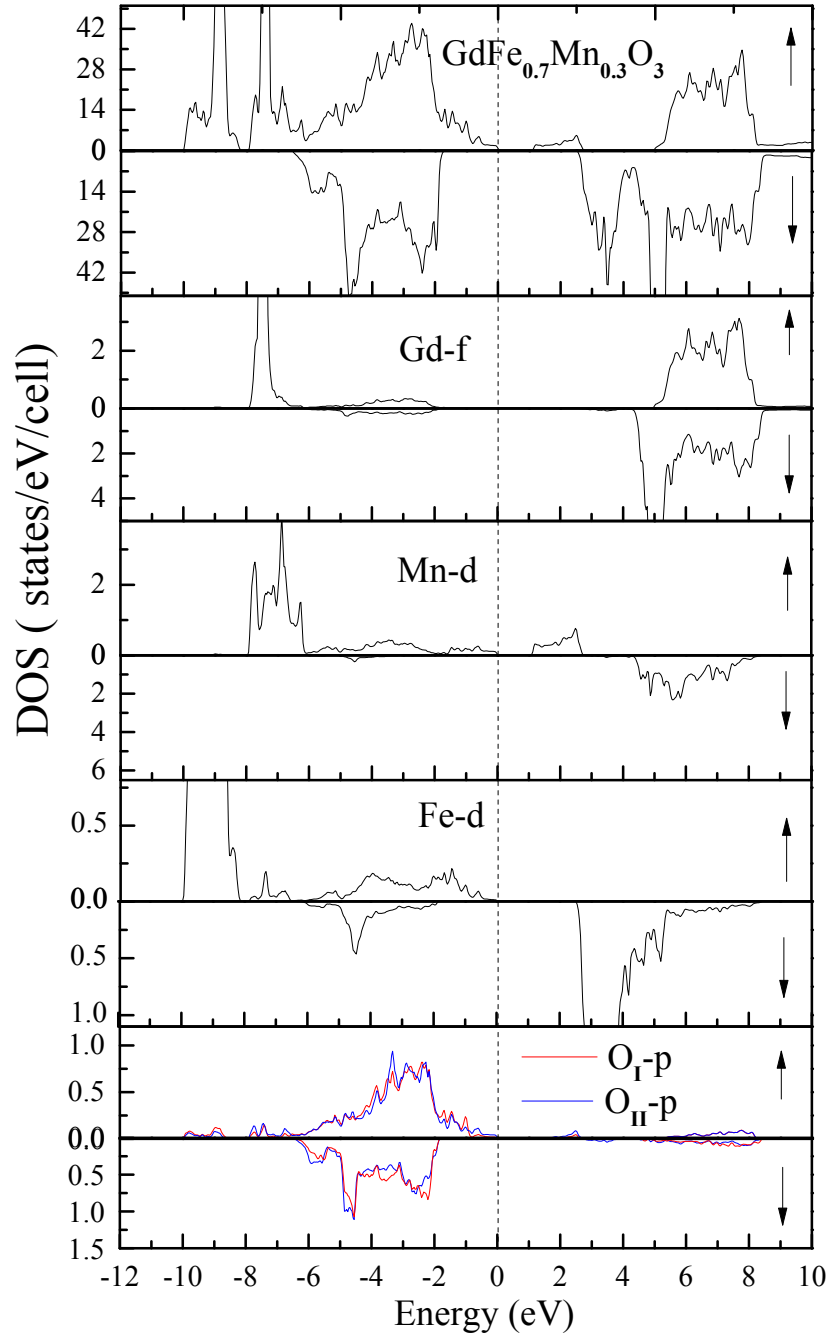

S 8. Spin-polarized DOS and PDOS spectra of  $\text{GdFe}_{0.7}\text{Mn}_{0.3}\text{O}_3$  obtained by GGA+U scheme

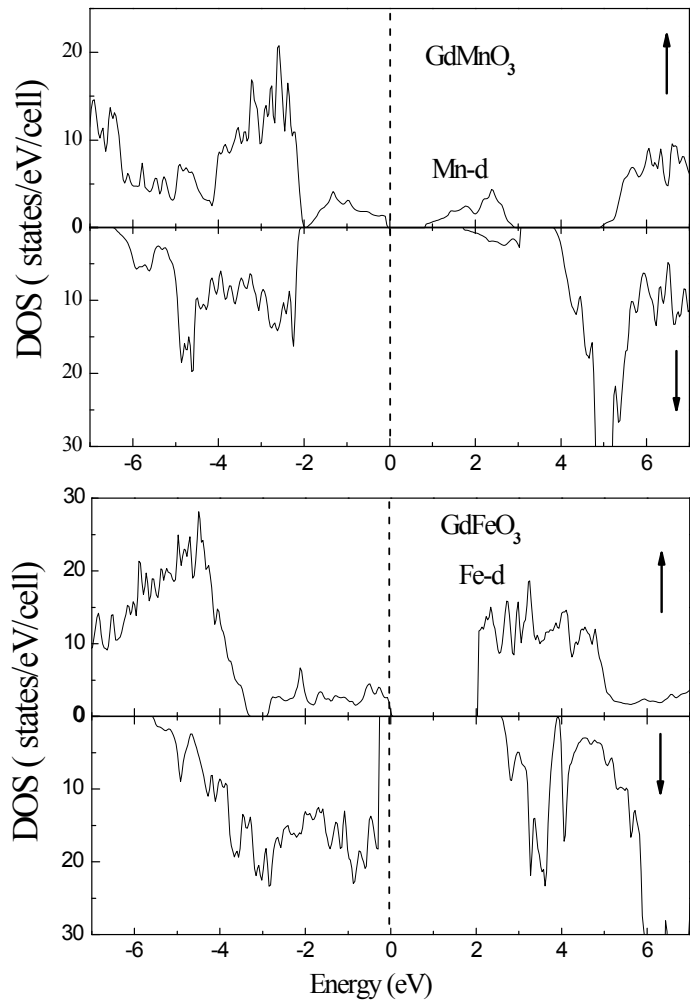

S 9. Spin-polarized DOS of GdMnO<sub>3</sub> and GdFeO<sub>3</sub> obtained by mBJ+U scheme

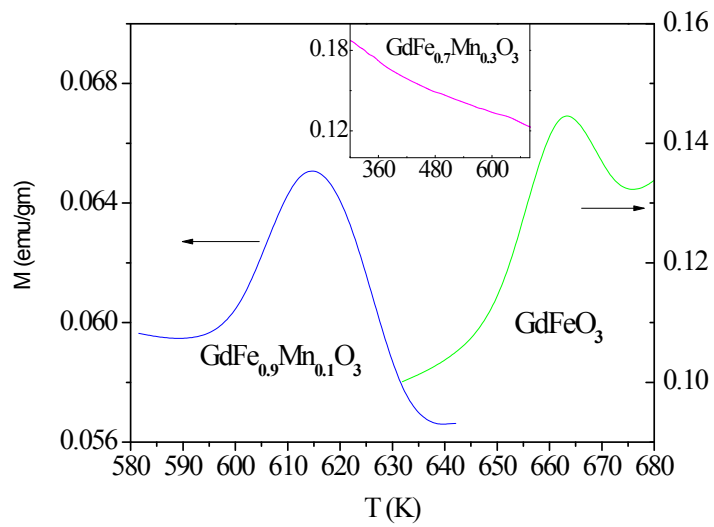

**S 10.** Variation of magnetization as a function of temperature.

**Table ST1** Comparison table of GdFeO<sub>3</sub> based catalysts for organic pollutant degradation.

| Catalyst                                                            | Synthesis Method                  | Calcination Temp. | Particle Size (nm) | Dye Used                                                                                  | Band gap (eV) | Degradation efficiency                                                          |
|---------------------------------------------------------------------|-----------------------------------|-------------------|--------------------|-------------------------------------------------------------------------------------------|---------------|---------------------------------------------------------------------------------|
| GdFeO <sub>3</sub> [Ref. 100]                                       | Sol Gel                           | 900°C             | 21 nm              | Turquoise Blue KGL,<br>Brilliant Blue KGR,<br>Brilliant Red X-3B,<br>Brilliant Orange K3N | -             | 74.9% in 120 min.<br>79.9% in 120 min.<br>96.5% in 120 min.<br>98.2 in 120 min. |
| GdFO <sub>3</sub> /Carbon nanotubes [Ref. 101]                      | Precipitation                     | 600°C             | Below 100 nm       | Methyl Orange                                                                             | 1.9           | 94% in 70 min.                                                                  |
| GdFeO <sub>3</sub> (Nano crystalline) [Ref. 102]                    | microwave synthesis               |                   | 80 nm              | Methyl Orange                                                                             | 2.1           | 70% in 120 min.                                                                 |
| GdFeO <sub>3</sub> nanoparticles [Ref. 103]                         | glycol-assisted sol-gel technique | 800°C             | 80 nm              | Rhodamine B                                                                               | 2.4           | 100% in 150 min.                                                                |
| GdFeO <sub>3</sub> [Ref. 104]                                       | Microwave-assisted synthesis      | NA                | 44–57 nm           | Rhodamine B                                                                               | 2.1           | 90% in 180 min.                                                                 |
| BiFeO <sub>3</sub> /GdFeO <sub>3</sub> nanocomposite [Ref. 105]     | Sol-Gel                           | 500°C             | 14–35 nm           | Methylene Blue                                                                            | 1.8           | 56% in 180 min.                                                                 |
| GdFeO <sub>3</sub> microspheres [Ref. 106]                          | Hydrothermal                      | 800°C             | 50–150 nm          | 4-CP                                                                                      | 2.02          | 85% in 300 min.                                                                 |
| GdFe <sub>0.7</sub> Mn <sub>0.3</sub> O <sub>3</sub> [Present work] | Sol-gel                           | 800°C             | 80 nm              | Rhodamine B                                                                               | 1.72          | 99% in 25 min.                                                                  |
